# Supplementary material
Source: Springer Nature journal article supplement (https://www.springermedizin.de/resource/supplementary/12889_2007_823_MOESM3_ESM.pdf/9501850)

Level

1

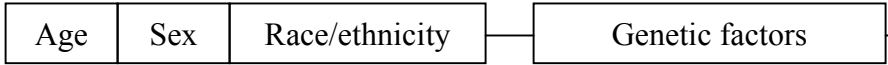

2

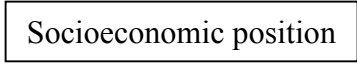

3

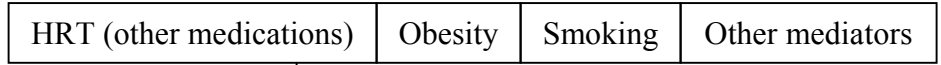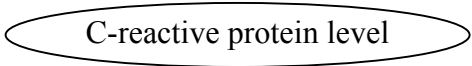

Supplement: MOESM3 [file 9501850]
